# Supplementary material for: Plant and Meadow Structure Characterisation of Posidonia oceanica in Its Westernmost Distribution Range
Source: MDPI journal article supplement (doi:10.3390/d15010101), 2023-01-12
Supplement: s1 [file s1]

Archive with 1 entries (1 files):
- diversity-2106736-supplementary.pdf
